# Supplementary material for: CK2 inhibition, lipophilicity and anticancer activity of new N1versus N2-substituted tetrabromobenzotriazole regioisomers
Source: Royal Society of Chemistry journal article supplement (doi:10.1039/d0nj01194k), 2020-01-01
Supplement: d0nj01194k1.pdf [file d0nj01194k1.pdf]

## Supporting information

# CK2 inhibition, lipophilicity and anticancer activity of substituted tetrabromobenzotriazole regioisomers

Ahmed El-Kardocy<sup>1</sup>, Yaser A. Mostafa<sup>2</sup>, Noha G. Mohamed<sup>1</sup>, Mohammad Nabil Abo-Zeid<sup>3</sup>, Nivin A. Hassan<sup>4</sup>, Helal F. Hetta<sup>5,6</sup> Abu-Baker M. Abdel-Aal<sup>1,2,\*</sup>

<sup>1</sup> Student research unit, Faculty of Pharmacy, Assiut University, Assiut 71526, Egypt.

<sup>2</sup> Department of Pharmaceutical Organic Chemistry, Faculty of Pharmacy, Assiut University, Assiut 71526, Egypt

<sup>3</sup> Department of Pharmaceutical Analytical Chemistry, Faculty of Pharmacy, Assiut University, Assiut 71526, Egypt

<sup>4</sup> Cancer Biology Department, South Egypt Cancer Institute, Assiut University, Assiut, Egypt

<sup>5</sup> Department of Medical Microbiology and Immunology, Faculty of Medicine, Assiut University, Assiut, Egypt

<sup>6</sup> Department of Internal Medicine, University of Cincinnati College of Medicine, Cincinnati, OH, USA

\* Correspondence: abobakr.elsayed@pharm.aun.edu.eg; Tel.: +02-0101-932-9596

## Table of Contents

|                                                                                                                                                                                                                          |    |
|--------------------------------------------------------------------------------------------------------------------------------------------------------------------------------------------------------------------------|----|
| <b>Supporting Information S1: Molecular modelling and docking with CK2<math>\alpha</math></b> .....                                                                                                                      | 2  |
| a) Binding of TBBt to CK2 $\alpha$ of Zea mays PDB code 1j91 <sup>1</sup> .....                                                                                                                                          | 2  |
| b) Binding of CX-4945 to human CK2 $\alpha$ PDB code 3pe1 <sup>2</sup> .....                                                                                                                                             | 2  |
| c) 2D representation of docked compounds <b>2-7</b> into human CK2 $\alpha$ PDB code 3pe1. ....                                                                                                                          | 3  |
| <b>Supporting Information S2: Cell viability of adrenocarcinoma cell lines treated with 0-20 <math>\mu</math>M of compound <b>5</b> for 48 h:</b> .....                                                                  | 4  |
| a) Lung cancer celline (A549).....                                                                                                                                                                                       | 4  |
| b) Breast cancer cell line (MCF-7) .....                                                                                                                                                                                 | 4  |
| <b>Supporting Information S3: The <math>R_{M0}</math> Values, C (the percentage of ACN), b (Slope) and r (Correlation Coefficient) of the Equation <math>R_M = R_{M0} + bC</math> for the studied compounds.....</b>     | 5  |
| <b>Supporting Information S4: The <math>R_{M0}</math> Values, C (the percentage of acetone), b (Slope) and r (Correlation Coefficient) of the Equation <math>R_M = R_{M0} + bC</math> for the studied compounds.....</b> | 5  |
| <b>Supporting Information S5: The <math>R_{M0}</math> Values, C (the percentage of MeOH), b (Slope) and r (Correlation Coefficient) of the Equation <math>R_M = R_{M0} + bC</math> for the studied compounds.....</b>    | 6  |
| <b>Supporting Information S6: IR, H-NMR and C13-NMR spectra .....</b>                                                                                                                                                    | 7  |
| References .....                                                                                                                                                                                                         | 22 |

## Supporting Information S1: Molecular modelling and docking with CK2 $\alpha$

a) Binding of TBBt to CK2 $\alpha$  of Zea mays PDB code 1j91<sup>1</sup>

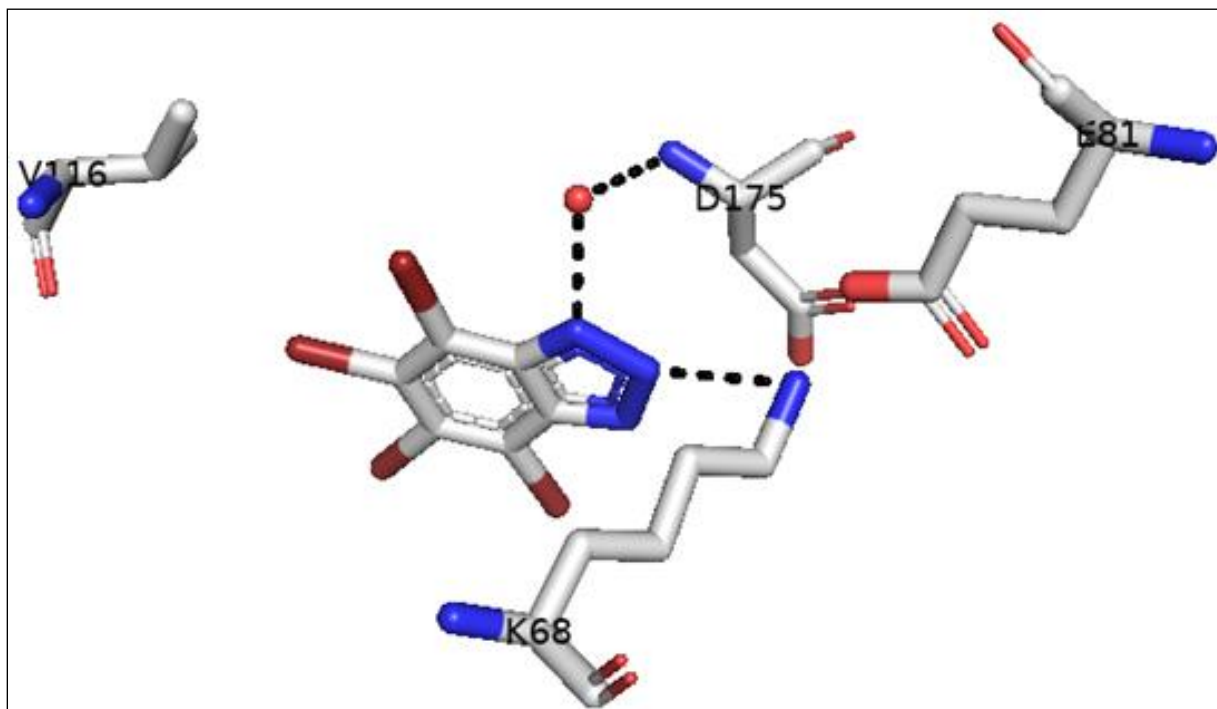

b) Binding of CX-4945 to human CK2 $\alpha$  PDB code 3pe1<sup>2</sup>

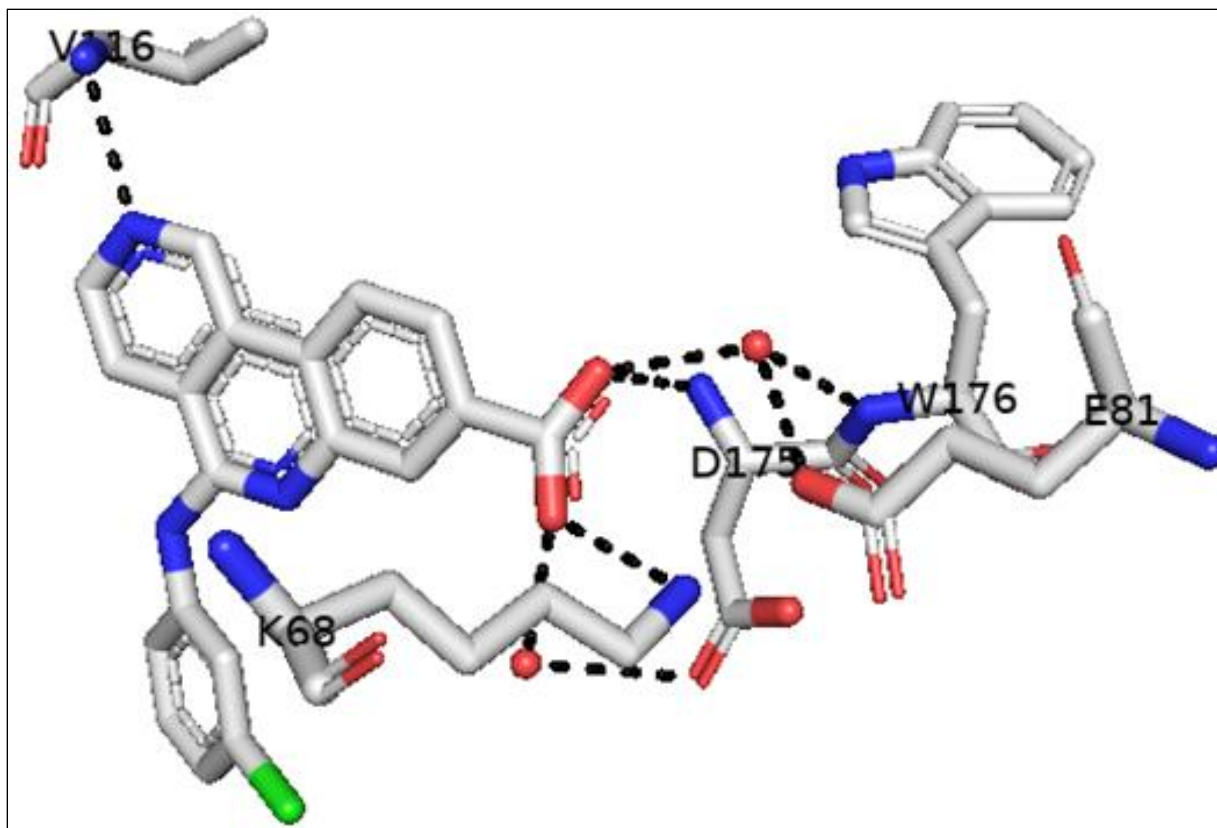

c) 2D representation of docked compounds **2-7** into human CK2 $\alpha$  PDB code 3pe1.

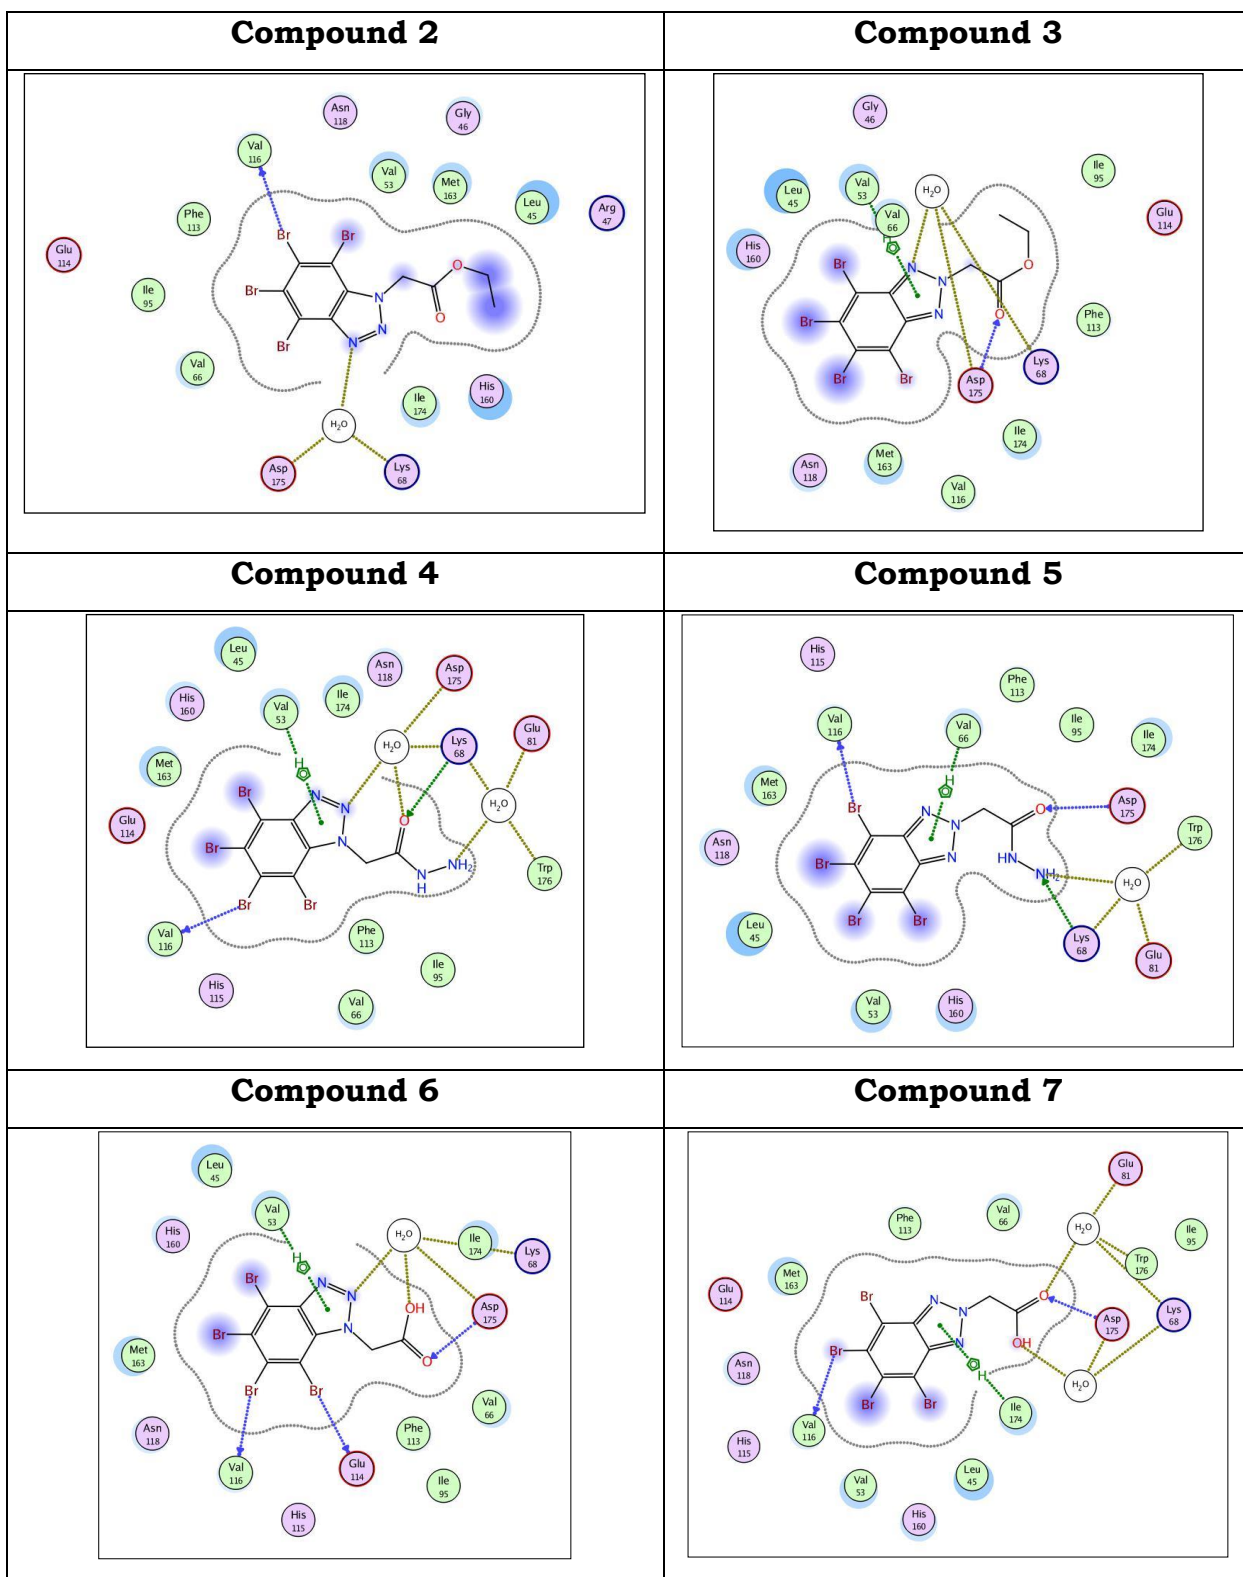

**Supporting Information S2:** Cell viability of adrenocarcinoma cell lines treated with 0-20  $\mu\text{M}$  of compound **5** for 48 h:

a) Lung cancer celline (A549)

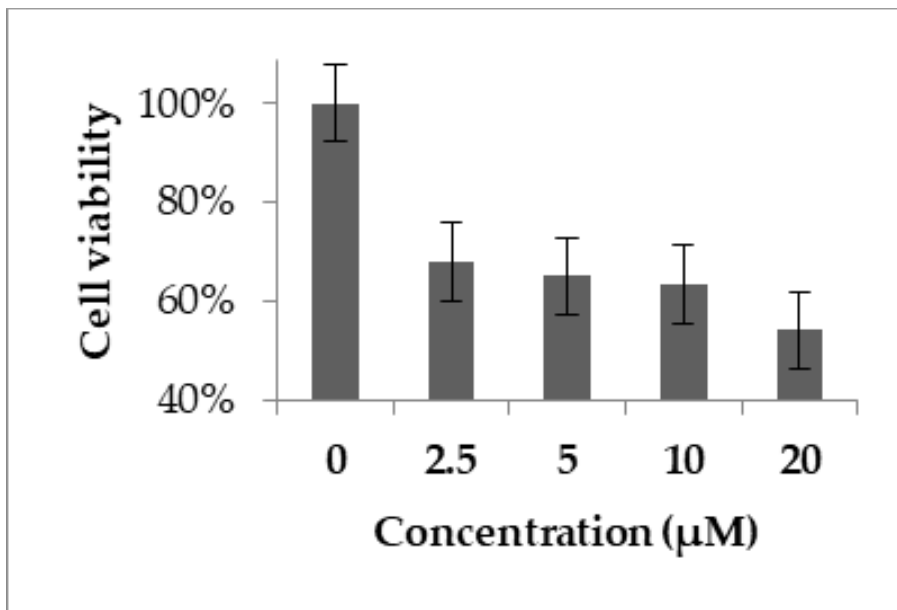

b) Breast cancer cell line (MCF-7)

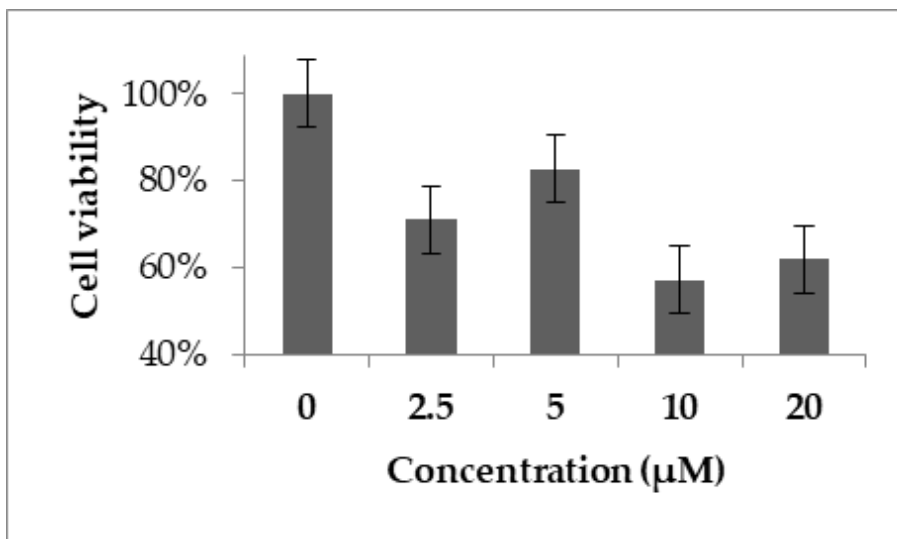

**Supporting Information S3:** The  $R_{M0}$  Values, C (the percentage of ACN), b (Slope) and r (Correlation Coefficient) of the Equation  $R_M = R_{M0} + bC$  for the studied compounds

| Compound | $R_{M0} \pm SD^a$    | $b \pm SD^a$         | r       | $C_0$   | C range (%) |
|----------|----------------------|----------------------|---------|---------|-------------|
| 1        | $2.0204 \pm 0.04229$ | $-0.0268 \pm 0.0006$ | -0.9984 | 75.3635 | 50-85       |
| 2        | $3.4181 \pm 0.0930$  | $-0.0404 \pm 0.0012$ | -0.9980 | 84.5186 | 65-95       |
| 3        | $3.6425 \pm 0.1131$  | $-0.0417 \pm 0.0015$ | -0.9976 | 87.2663 | 65-90       |
| 4        | $1.3857 \pm 0.0761$  | $-0.0240 \pm 0.0011$ | -0.9960 | 57.7832 | 55-85       |
| 5        | $2.5564 \pm 0.0529$  | $-0.0326 \pm 0.0007$ | -0.9985 | 78.4901 | 55-90       |
| 6        | $1.451 \pm 0.0795$   | $-0.0304 \pm 0.0013$ | -0.9972 | 47.7918 | 50-70       |
| 7        | $1.2837 \pm 0.0552$  | $-0.0258 \pm 0.0009$ | -0.9978 | 49.8534 | 50-80       |

**Supporting Information S4:** The  $R_{M0}$  Values, C (the percentage of acetone), b (Slope) and r (Correlation Coefficient) of the Equation  $R_M = R_{M0} + bC$  for the studied compounds

| Compound | $R_{M0} \pm SD^a$   | $b \pm SD^a$         | r       | $C_0$   | C range (%) |
|----------|---------------------|----------------------|---------|---------|-------------|
| 1        | $3.1568 \pm 0.1224$ | $-0.0428 \pm 0.0017$ | -0.9944 | 73.7719 | 50-90       |
| 2        | $4.1509 \pm 0.1421$ | $-0.0512 \pm 0.0018$ | -0.9970 | 81.1310 | 65-95       |
| 3        | $4.5127 \pm 0.1152$ | $-0.0543 \pm 0.0015$ | -0.9980 | 83.0556 | 60-90       |
| 4        | $3.0668 \pm 0.1654$ | $-0.0412 \pm 0.0023$ | -0.9911 | 74.5265 | 55-90       |

|          |                     |                      |         |         |       |
|----------|---------------------|----------------------|---------|---------|-------|
| <b>5</b> | $3.6874 \pm 0.1008$ | $-0.0470 \pm 0.0013$ | -0.9972 | 78.4945 | 55-95 |
| <b>6</b> | $1.5057 \pm 0.0560$ | $-0.0271 \pm 0.0008$ | -0.9971 | 55.6552 | 50-95 |
| <b>7</b> | $2.1072 \pm 0.0630$ | $-0.0351 \pm 0.0009$ | -0.9980 | 60.0623 | 50-90 |

**Supporting Information S5:** The  $R_{M0}$  Values, C (the percentage of MeOH), b (Slope) and r (Correlation Coefficient) of the Equation  $R_M = R_{M0} + bC$  for the studied compounds

| <b>Compound</b> | $R_{M0} \pm SD^a$   | $b \pm SD^a$         | <b>r</b> | <b>C<sub>0</sub></b> | <b>C range (%)</b> |
|-----------------|---------------------|----------------------|----------|----------------------|--------------------|
| <b>1</b>        | $3.5926 \pm 0.0943$ | $-0.0416 \pm 0.0015$ | -0.9978  | 86.3354              | 60-90              |
| <b>2</b>        | $4.0138 \pm 0.1422$ | $-0.0429 \pm 0.0018$ | -0.9975  | 93.6391              | 70-90              |
| <b>3</b>        | $4.6874 \pm 0.5309$ | $-0.0488 \pm 0.006$  | -0.9831  | 96.1315              | 75-90              |
| <b>4</b>        | $2.2595 \pm 0.1136$ | $-0.0286 \pm 0.0015$ | -0.9932  | 79.0453              | 60-90              |
| <b>5</b>        | $3.8767 \pm 0.1883$ | $-0.0438 \pm 0.0023$ | -0.9957  | 88.5524              | 70-90              |
| <b>6</b>        | $2.6161 \pm 0.0908$ | $-0.0397 \pm 0.0013$ | -0.9974  | 65.8293              | 50-85              |
| <b>7</b>        | $3.3822 \pm 0.1099$ | $-0.0465 \pm 0.0015$ | -0.9979  | 72.6917              | 60-85              |

## Supporting Information S6: IR, H-NMR and C13-NMR spectra

### 1- H<sup>1</sup>-NMR spectrum of compound 2

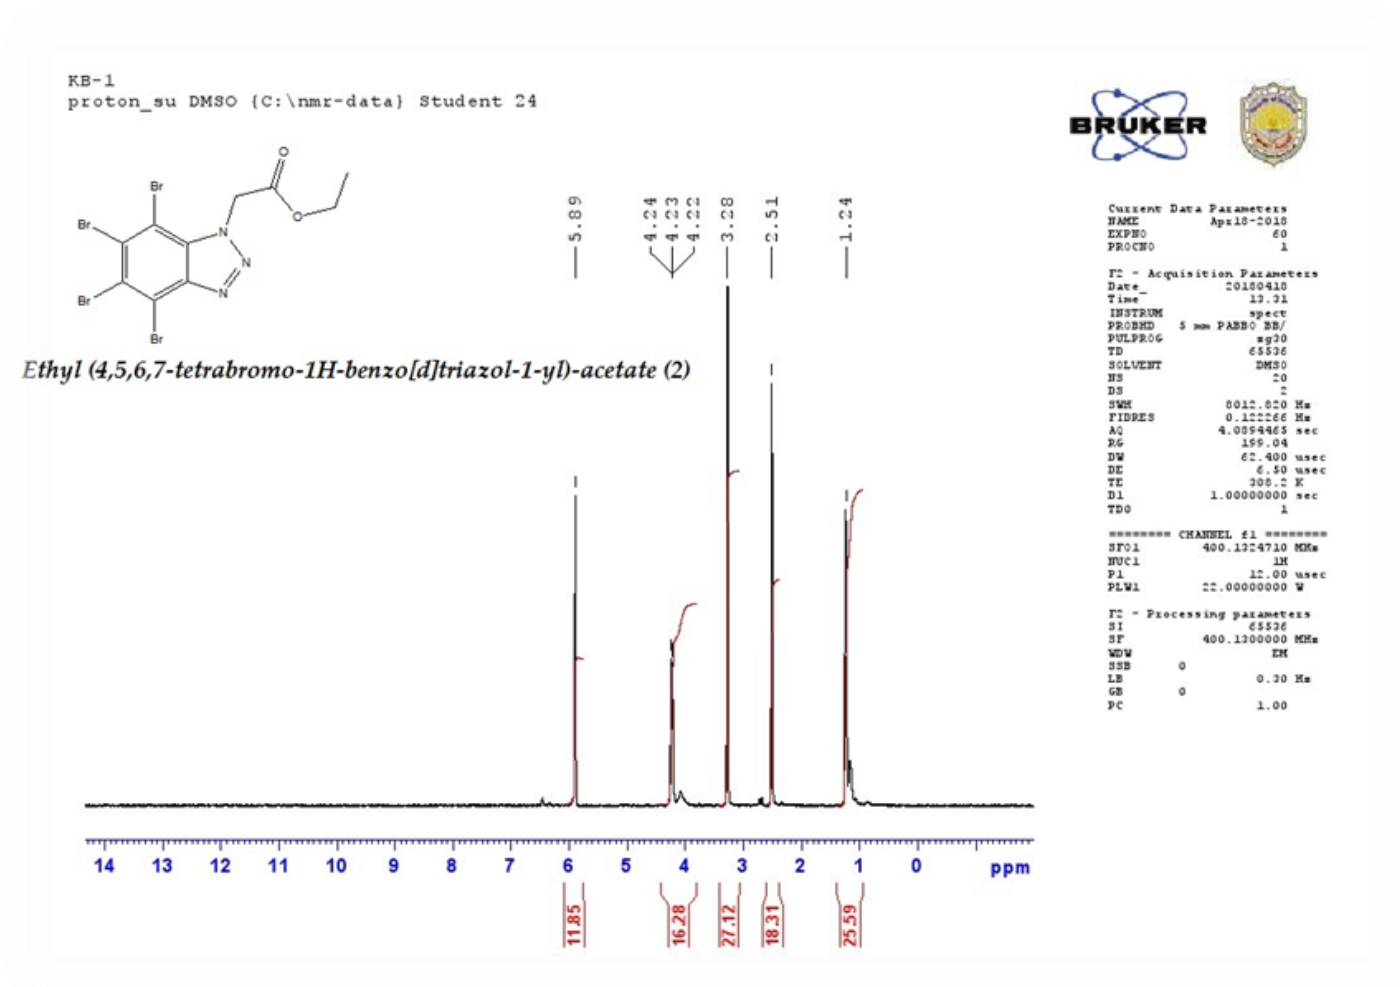

## 2- $C^{13}$ -NMR spectrum of compound 2

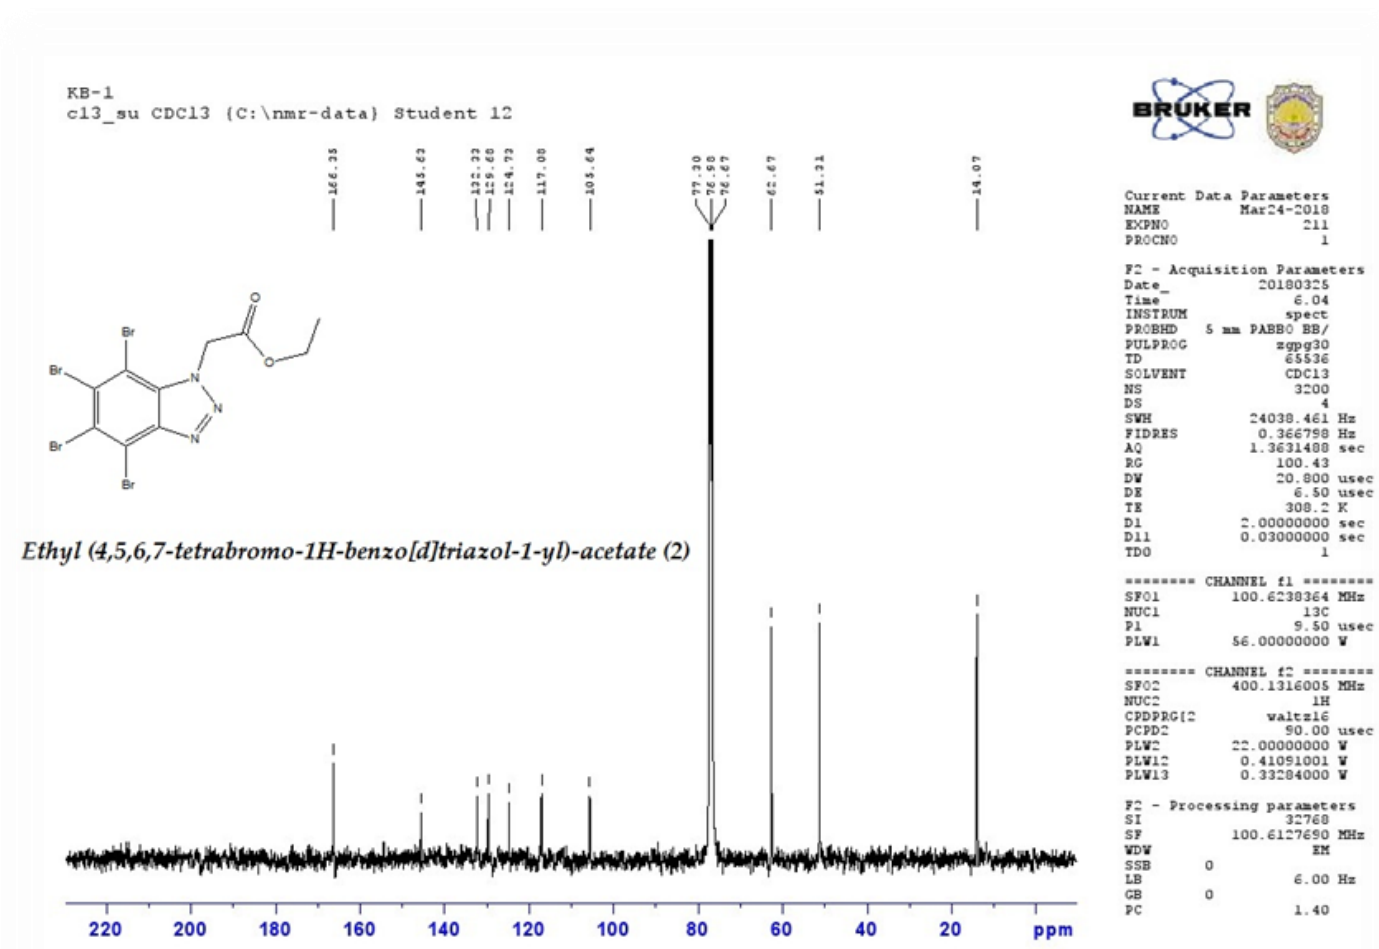



#### 4- IR spectrum of compound 2

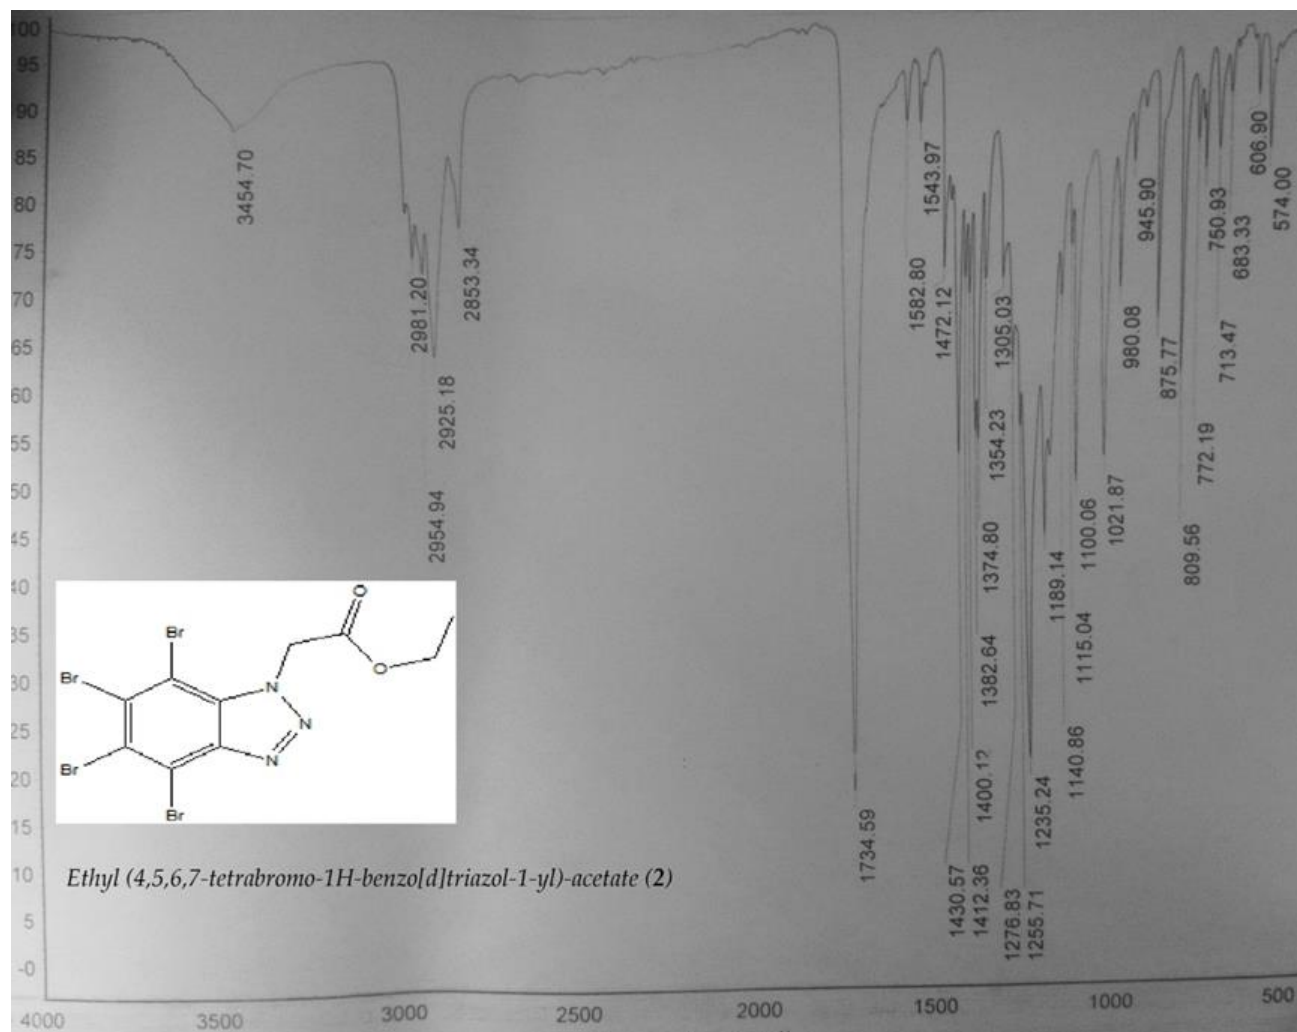

5- <sup>1</sup>H-NMR spectrum of compound 3

KA-1  
proton\_su DMSO (C:\nmr-data) Student 15

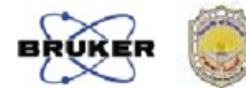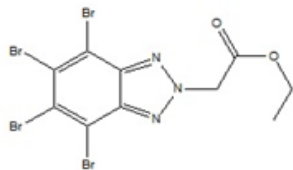

*Ethyl (4,5,6,7-tetrabromo-2H-benzo[d]triazol-2-yl)-acetate (3)*

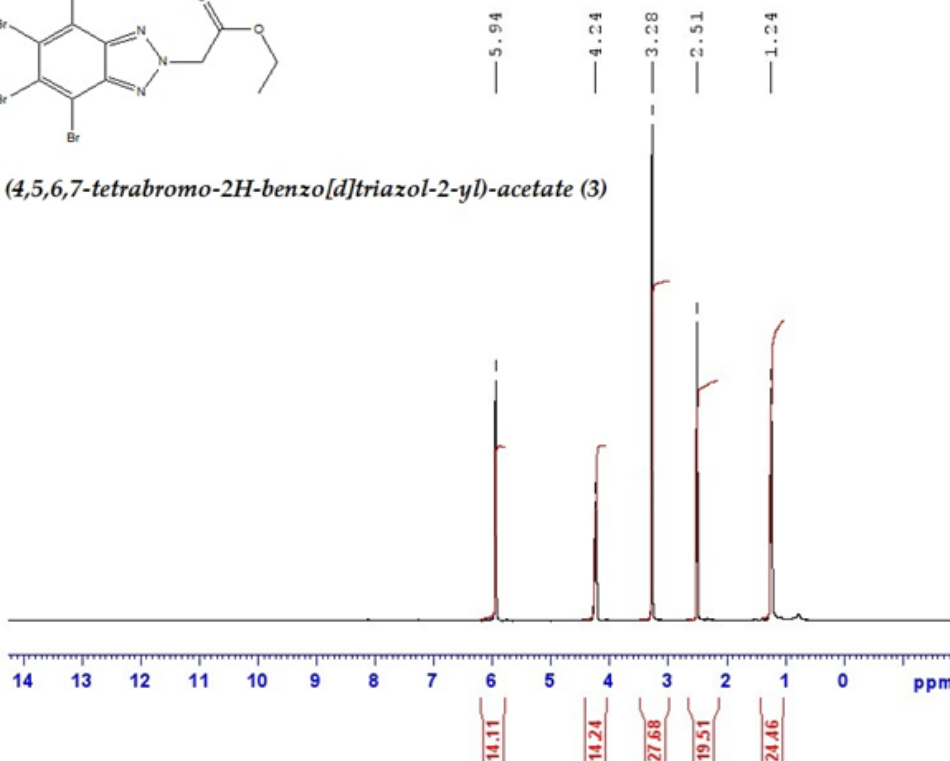

```

Current Data Parameters
NAME          Apr17-2015
EXPNO         200
PROCNO        1

F2 - Acquisition Parameters
Date_         20150417
Time          15:23
INSTRUM       spect
PROBHD        5 mm PABBO BB/
PULPROG       zg30
TD            65536
SOLVENT       DMSO
NS            100
DS            2
SWH           8012.820 Hz
FIDRES        0.122266 Hz
AQ            4.055465 sec
RG            159.04
DW            22.400 usec
DE            6.50 usec
TE            305.1 K
D1            1.00000000 sec
TDO           1

===== CHANNEL f1 =====
SF01          400.1324710 MHz
NUC1          1H
P1            12.00 usec
PLW1          22.00000000 W

F2 - Processing parameters
SI            65536
SF            400.1300000 MHz
WDW           EM
SSB           0
LB            0.20 Hz
GB            0
PC            1.00
    
```

# 6- $C^{13}$ -NMR spectrum of compound 3

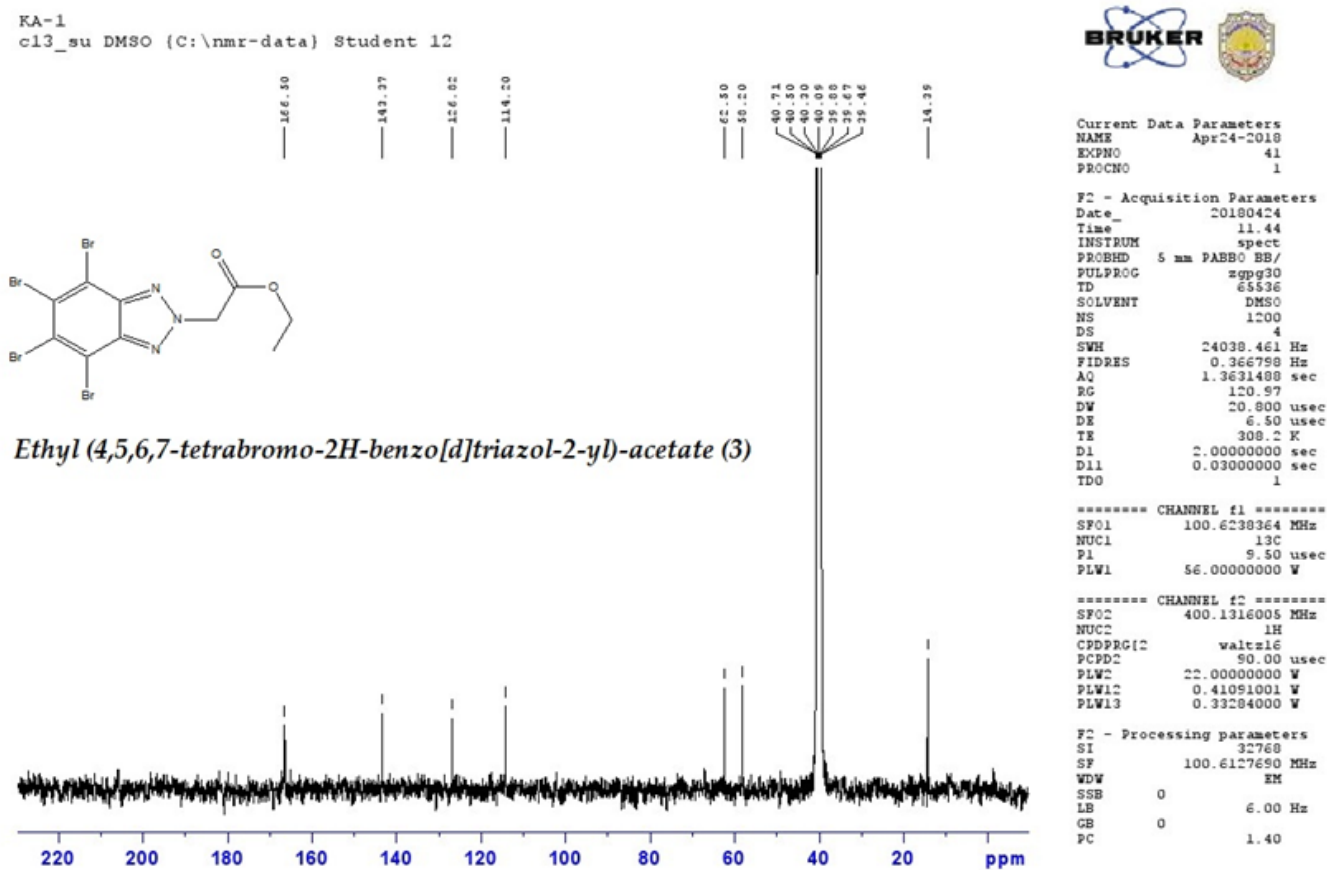

7- IR spectrum of compound 3

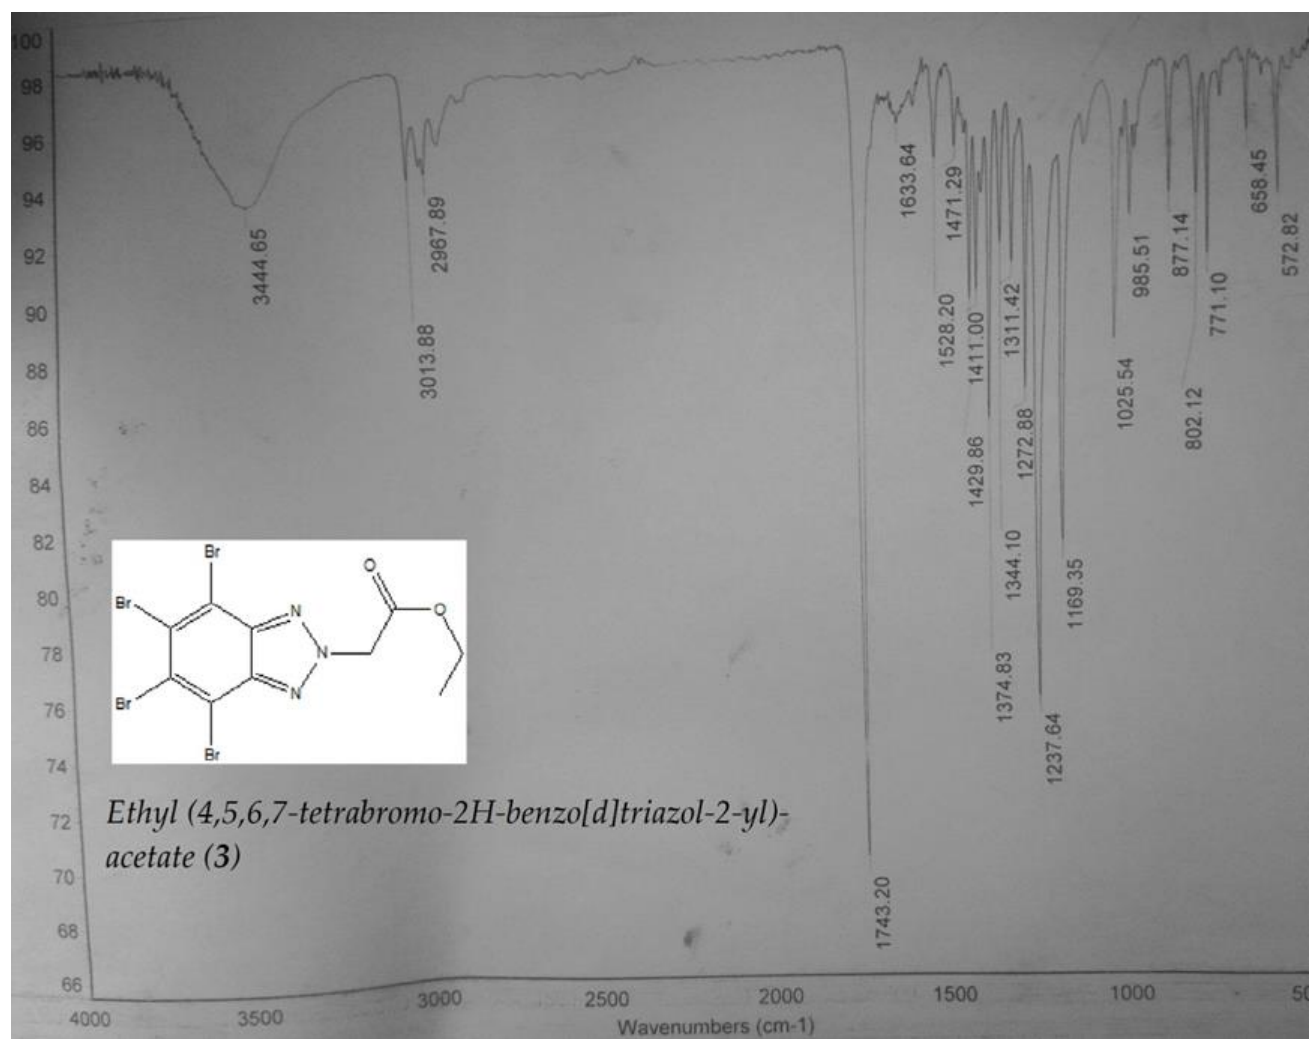

8- <sup>1</sup>H-NMR spectrum of compound 4

EX-ABOBAKR-KB2  
 PROTON\_BSU DMSO {C:\data} abeer 6

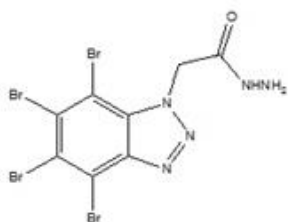

2-(4,5,6,7-tetrabromo-1H-benzo[d]triazol-1-yl)acetohydrazide (4)

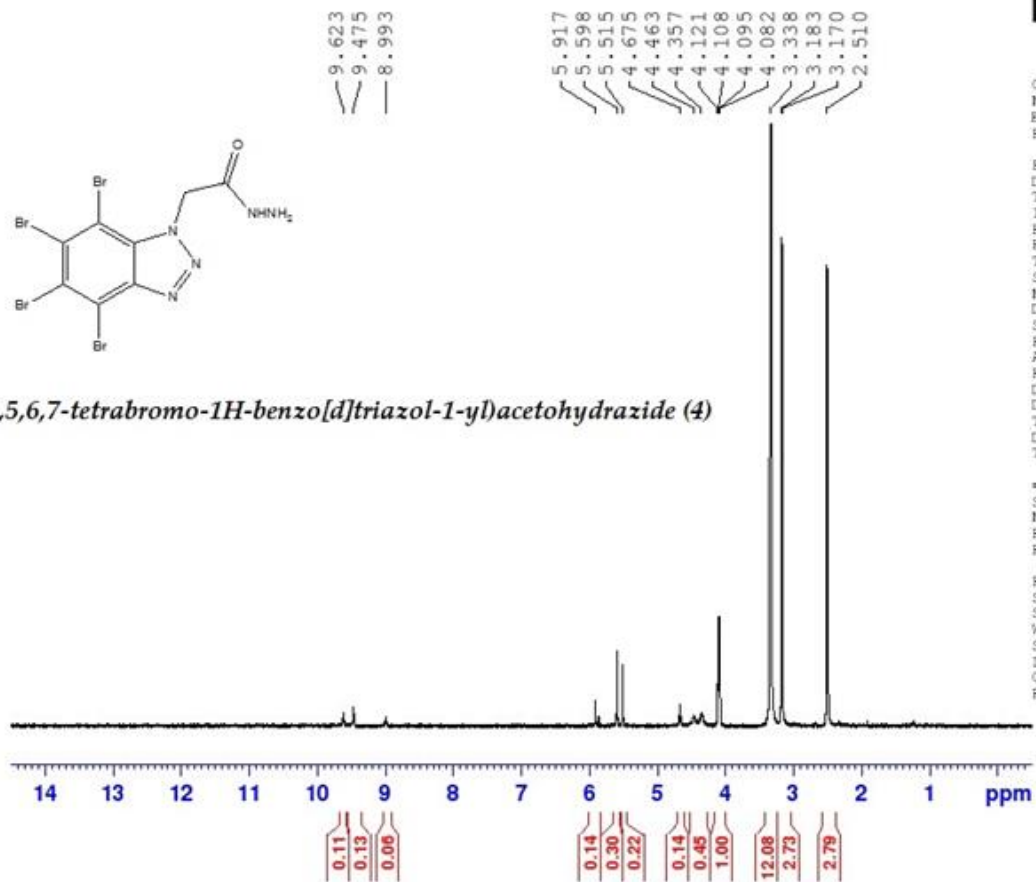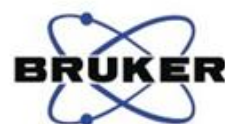

Current Data Parameters  
 NAME Jun21-2018-abeer  
 EXPNO 240  
 PROCNO 1

F2 - Acquisition Parameters  
 Date\_ 20180622  
 Time\_ 23.49  
 INSTRUM spect  
 PROBHD 5 mm PABBO BB/  
 PULPROG zg30  
 TD 65536  
 SOLVENT DMSO  
 NS 16  
 DS 2  
 SWH 8012.820 Hz  
 FIDRES 0.122266 Hz  
 AQ 4.0894465 sec  
 RG 147.93  
 DW 62.400 usec  
 DE 6.50 usec  
 TE 298.1 K  
 D1 1.00000000 sec  
 TDO 1

===== CHANNEL f1 =====  
 SFO1 400.1324710 MHz  
 NUC1 1H  
 P1 10.00 usec  
 PLW1 16.00000000 W

F2 - Processing parameters  
 SI 65536  
 SF 400.1300000 MHz  
 WDW EM  
 SSB 0  
 LB 0.10 Hz  
 GB 0  
 PC 1.00

## 9- C13-NMR spectrum of compound 4

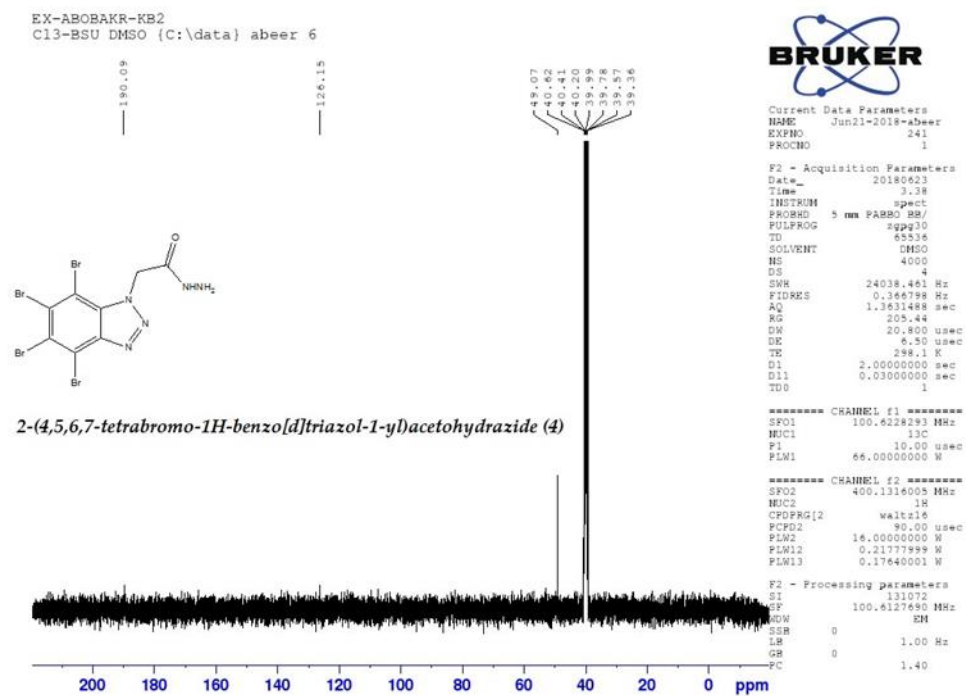

## 10- IR spectrum of compound 4

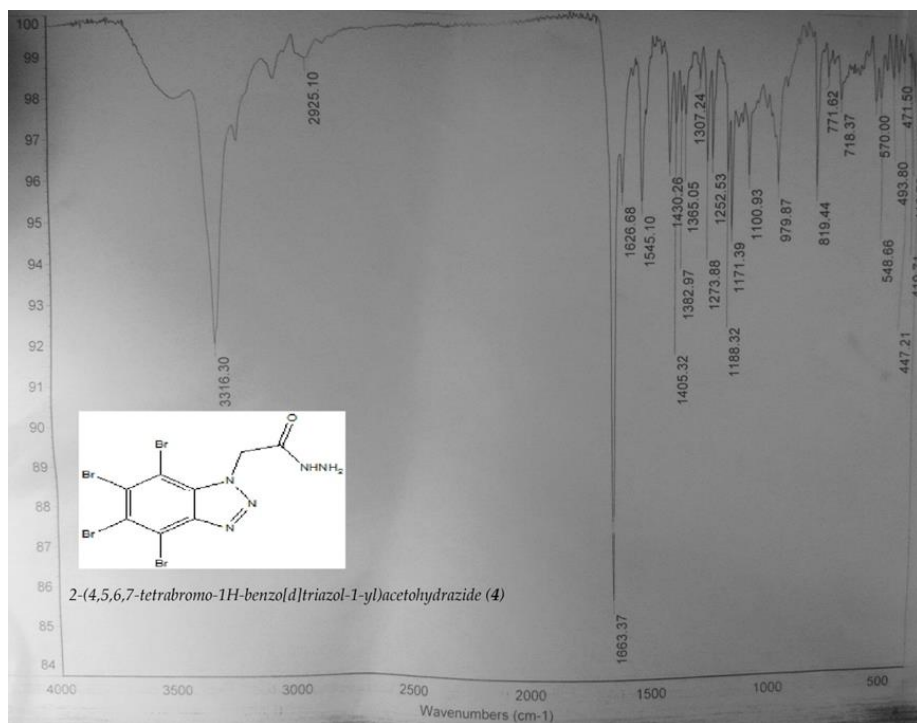

# 11- <sup>1</sup>H-NMR spectrum of compound 5

KA-2  
proton\_su DMSO (C:\nmr-data) Student 13

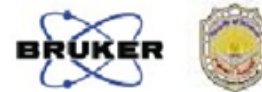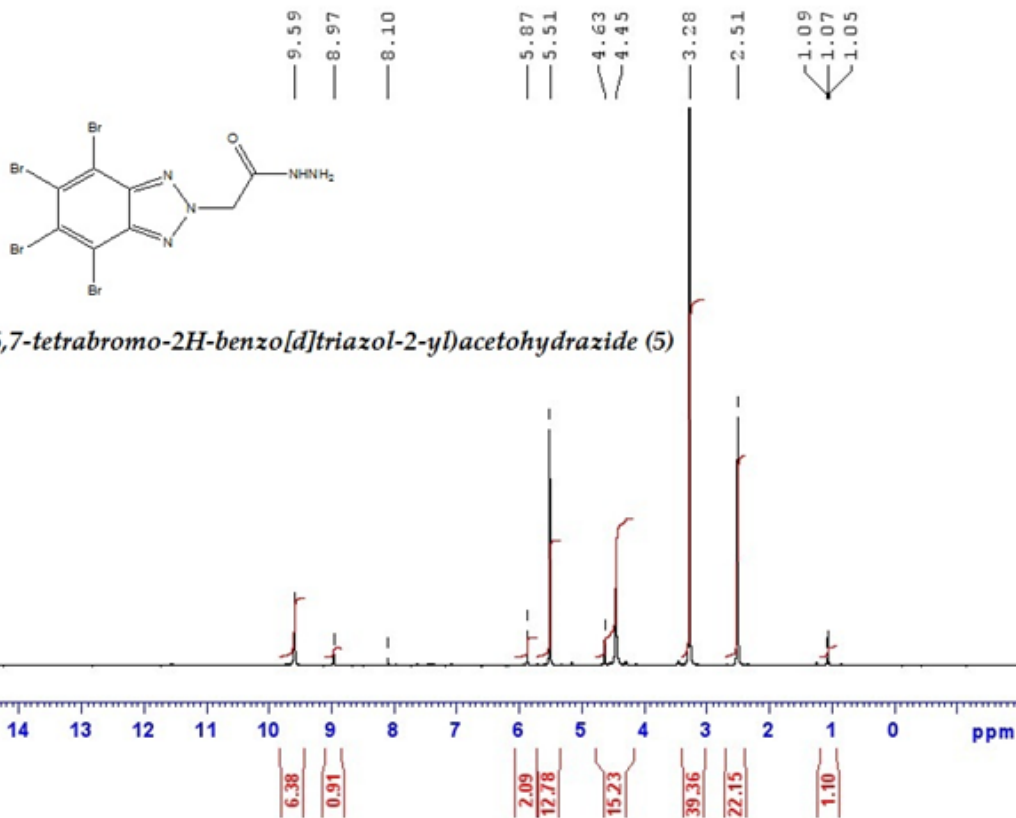

```

Current Data Parameters
NAME      Apr24-2018
EXPNO    50
PROCNO   1

F2 - Acquisition Parameters
Date_    20180424
Time     11.48
INSTRUM spect
PROBHD   5 mm PABBO BB/
PULPROG zg30
TD       65536
SOLVENT  DMSO
NS       20
DS       2
SWH      8012.820 Hz
FIDRES   0.122266 Hz
AQ       4.089465 sec
RG       159.04
DW       62.400 usec
DE       6.50 usec
TE       308.2 K
D1       1.00000000 sec
TDO      1

===== CHANNEL f1 =====
SF01    400.1324710 MHz
NUC1     1H
P1       12.00 usec
PLW1    22.00000000 W

F2 - Processing parameters
SI       65536
SF       400.1300000 MHz
WDW      EM
SSB      0
LB       0.30 Hz
GB       0
PC       1.00
    
```

## 12- C13-NMR spectrum of compound 5

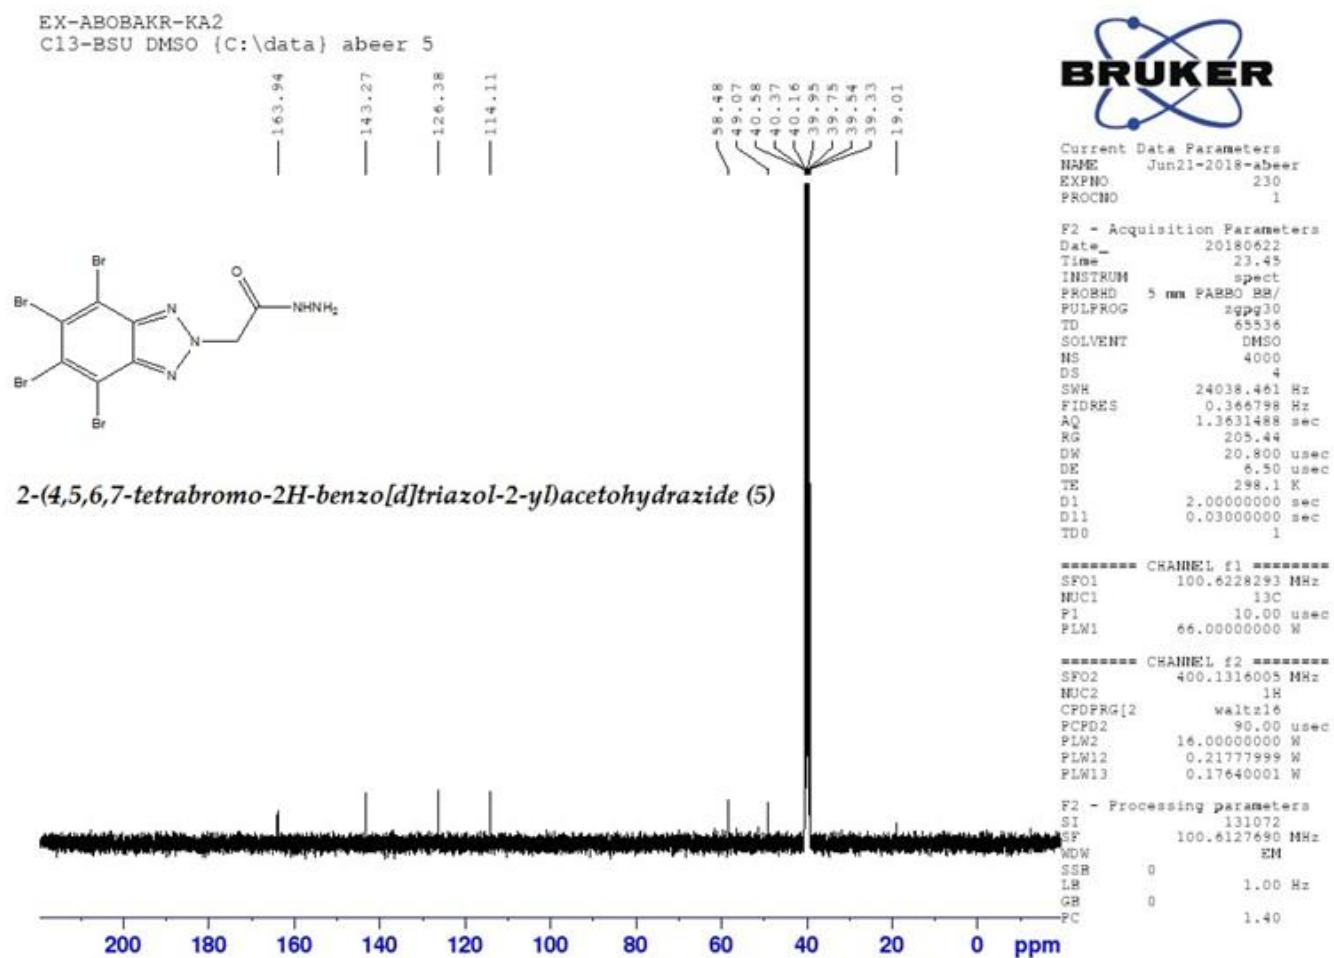



13- IR spectrum of compound 5

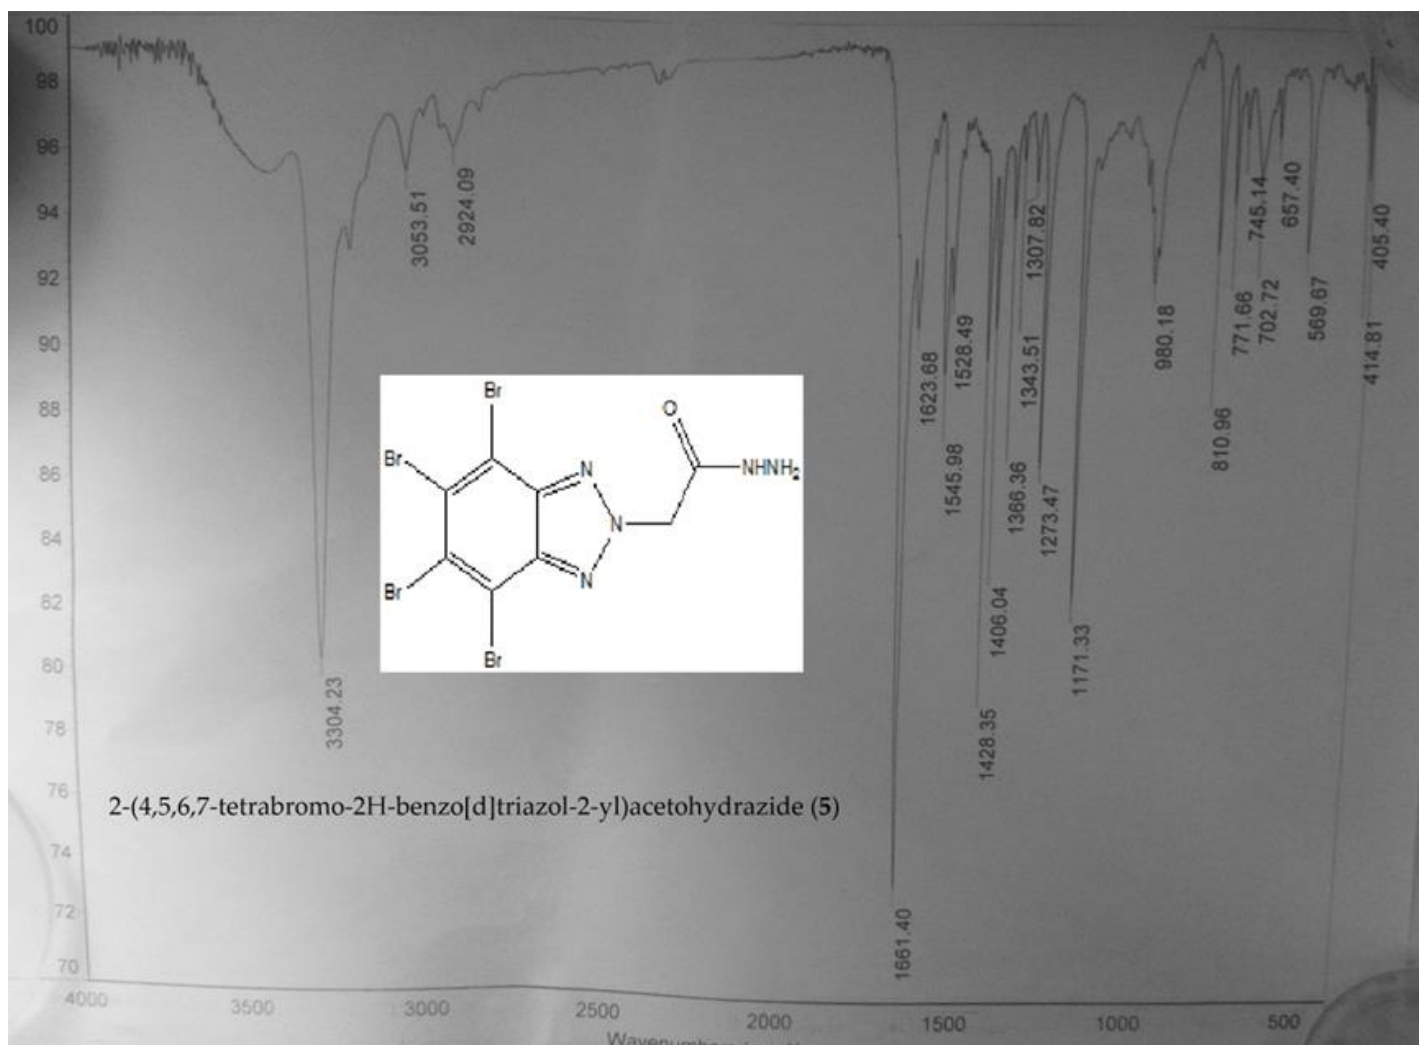

14- H1-NMR spectrum of compound 6

KB  
proton\_su DMSO (C:\nmr-data) Student 3

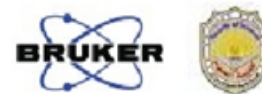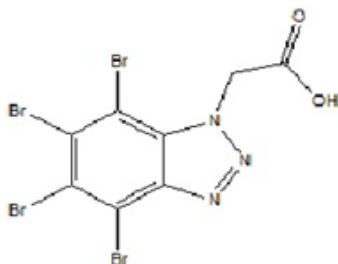

2-(4,5,6,7-tetrabromo-1H-benzo[d]triazol-1-yl)acetic acid (6)

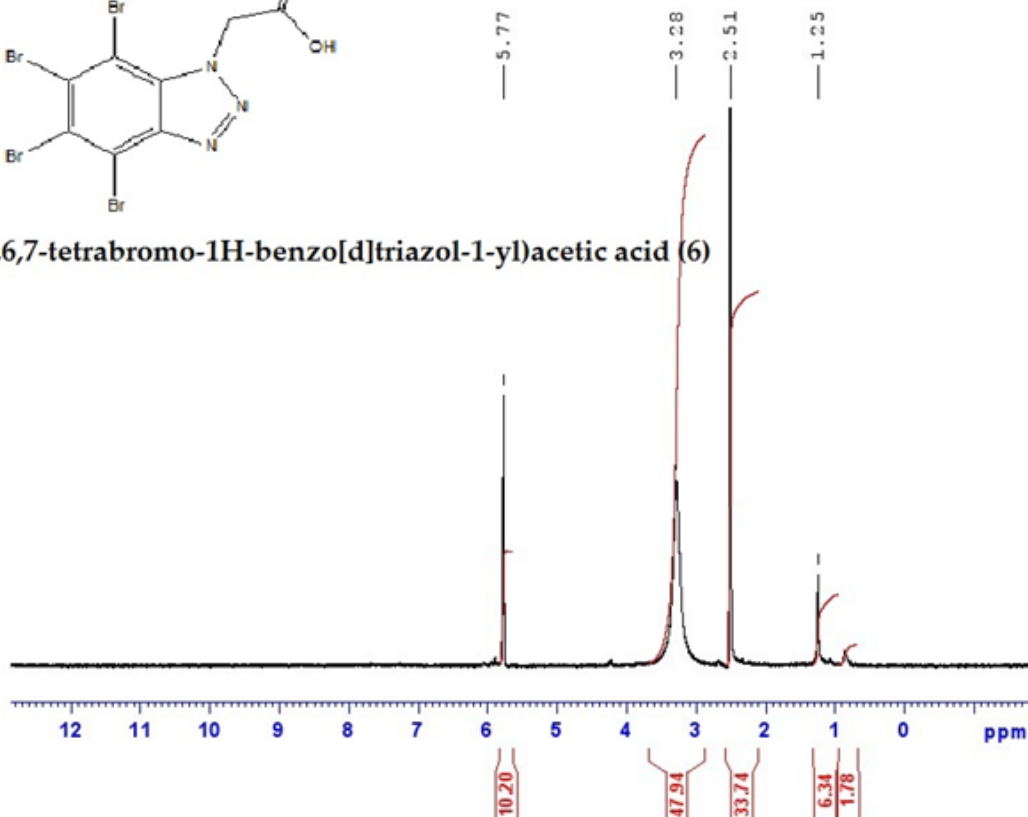

```

Current Data Parameters
NAME      April-2016
EXPNO    50
PROCNO   1

F2 - Acquisition Parameters
Date_    20160410
Time     12.46
INSTRUM  spect
PROBHD   5 mm PABBO BB/
PULPROG  zg30
TD        65536
SOLVENT  DMSO
NS        20
DS        2
SWH       8012.820 Hz
FIDRES    0.122266 Hz
AQ        4.0594465 sec
RG        159.04
DW        62.400 usec
DE        6.50 usec
TE        306.2 K
D1        1.00000000 sec
TDO       1

***** CHANNEL f1 *****
SFO1     400.1324710 MHz
NUC1     1H
P1       12.00 usec
PLW1     22.00000000 W

F2 - Processing parameters
SI       65536
SF       400.1300000 MHz
WDW      EM
SSB      0
LB       0.20 Hz
GB       0
PC       1.00
    
```

## 15- C13-NMR spectrum

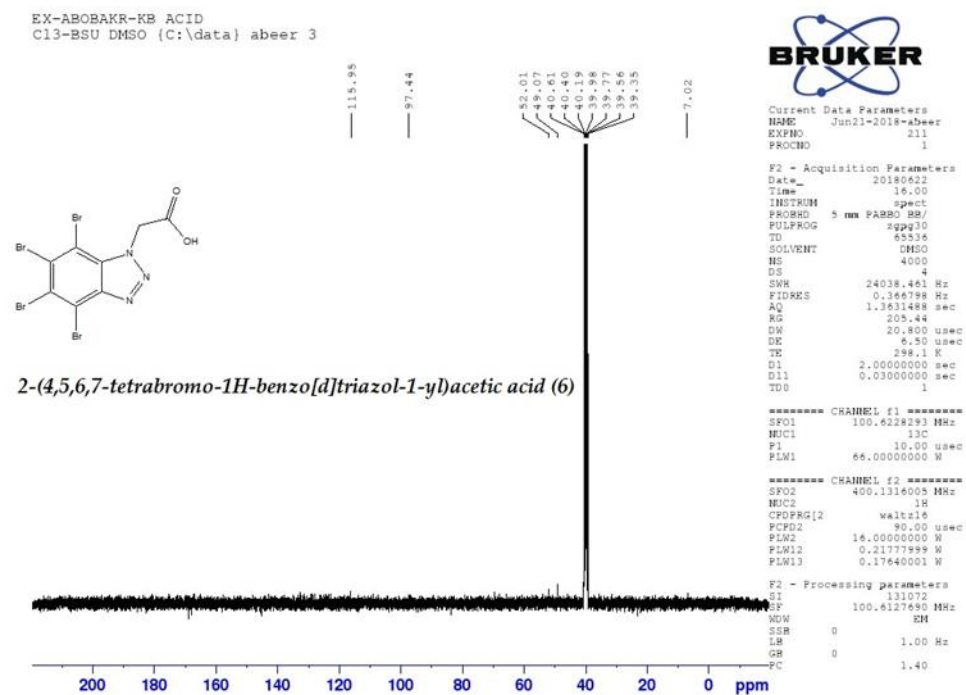

## 16- IR spectrum of compound 6

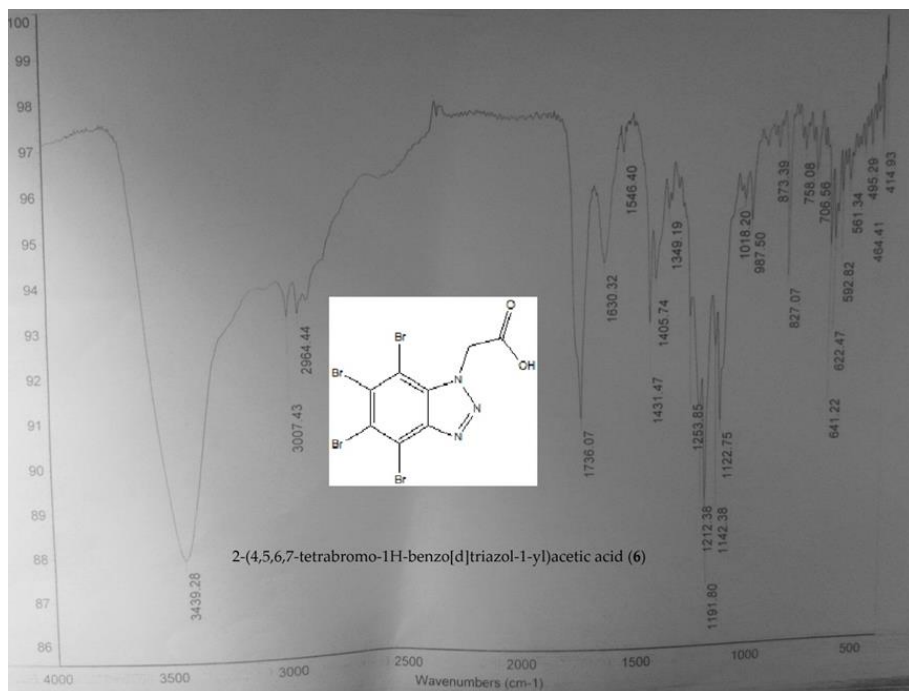

# 17- <sup>1</sup>H-NMR spectrum of compound 7

KA  
proton\_su DMSO (C:\nmr-data) Student 6

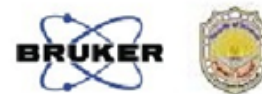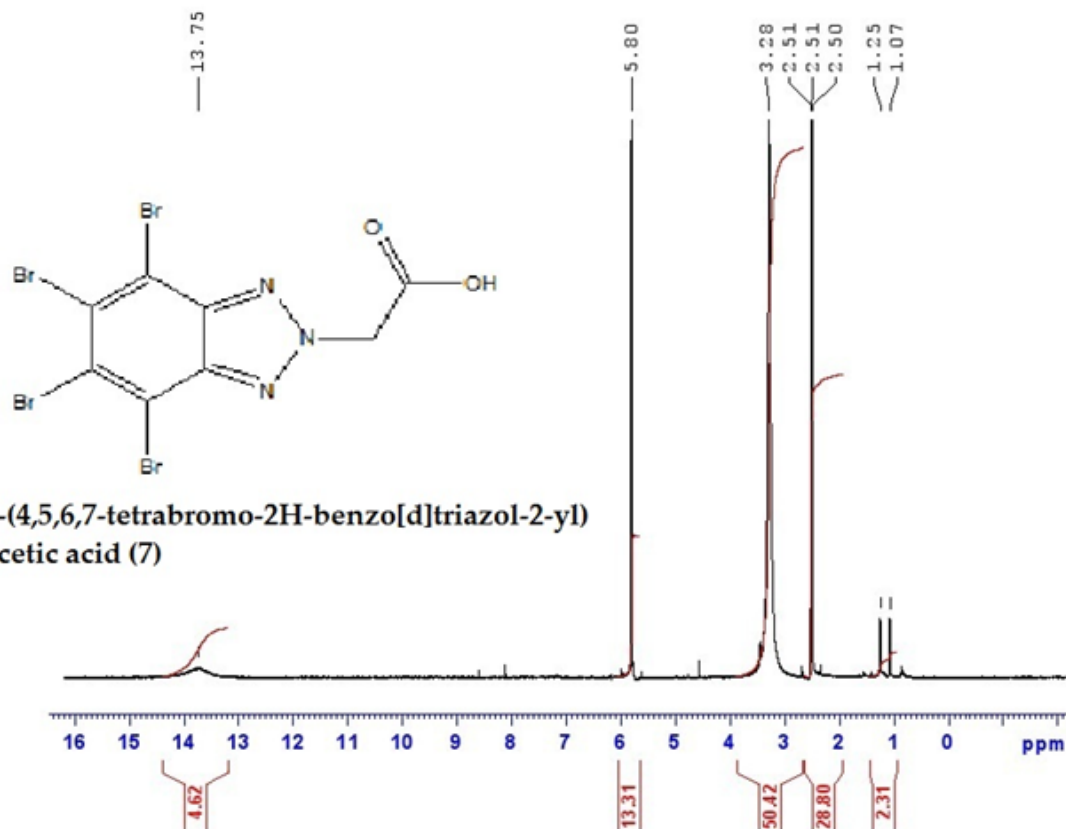

```

Current Data Parameters
NAME      Apr21-2016
EXPNO    50
PROCNO   1

F2 - Acquisition Parameters
Date_    20160421
Time     23.36
INSTRUM  spect
PROBHD   5 mm PABBO BB/
PULPROG  zg20
TD        65536
SOLVENT  DMSO
NS        150
DS        2
SWH       8012.820 Hz
FIDRES   0.122266 Hz
AQ        4.0594465 sec
RG        159.04
DW        62.400 usec
DE        6.50 usec
TE        305.2 K
D1        1.00000000 sec
TD0       1

***** CHANNEL f1 *****
SFO1     400.1324710 MHz
NUC1     1H
P1       12.00 usec
PLW1     22.00000000 W

F2 - Processing parameters
SI        65536
SF        400.1300000 MHz
WDW       EM
SSB       0
LB        0.20 Hz
GB        0
PC        1.00
    
```

# 18- C13-NMR spectrum of compound 7

EX-ABOBAKR-KA ACID  
 C13-BSU DMSO (C:\data) abeer 4

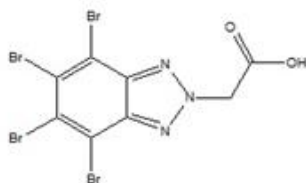

2-(4,5,6,7-tetrabromo-2H-benzo[d]triazol-2-yl)acetic acid (7)

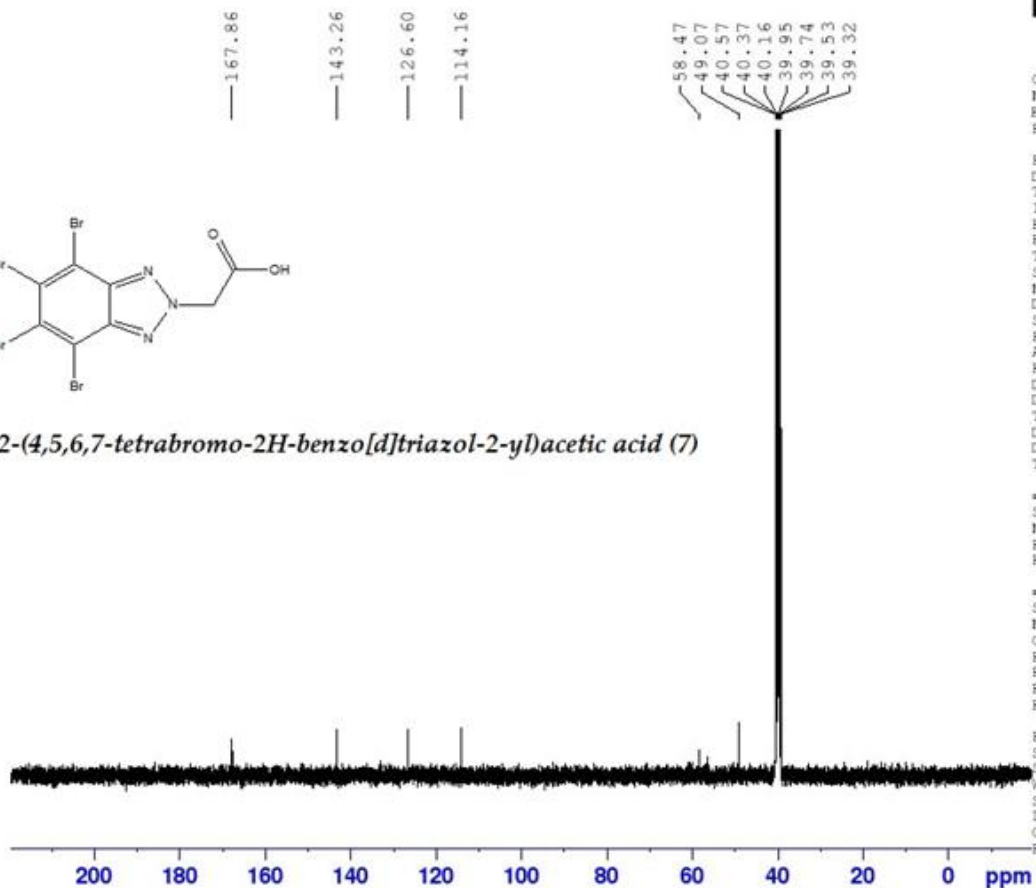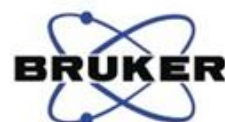

Current Data Parameters  
 NAME Jun21-2018-abeer  
 EXPNO 221  
 PROCNO 1

F2 - Acquisition Parameters  
 Date\_ 20180622  
 Time 19.53  
 INSTRUM spect  
 PROBHD 5 mm PABBO BB/  
 PULPROG zgpg30  
 TD 65536  
 SOLVENT DMSO  
 NS 4000  
 DS 4  
 SWH 24038.461 Hz  
 FIDRES 0.366798 Hz  
 AQ 1.3631488 sec  
 RG 205.44  
 DW 20.800 usec  
 DE 6.50 usec  
 TE 298.1 K  
 D1 2.00000000 sec  
 D11 0.03000000 sec  
 TD0 1

===== CHANNEL f1 =====  
 SFO1 100.6228293 MHz  
 NUC1 13C  
 P1 10.00 usec  
 PLW1 66.00000000 W

===== CHANNEL f2 =====  
 SFO2 400.1316005 MHz  
 NUC2 1H  
 CPDPRG[2] waltz16  
 PCPD2 90.00 usec  
 PLW2 16.00000000 W  
 PLW12 0.21777999 W  
 PLW13 0.17640001 W

F2 - Processing parameters  
 SI 131072  
 SF 100.6127690 MHz  
 WDW EH  
 SSB 0  
 LB 1.00 Hz  
 GB 0  
 PC 1.40

## 19- IR spectrum of compound 7

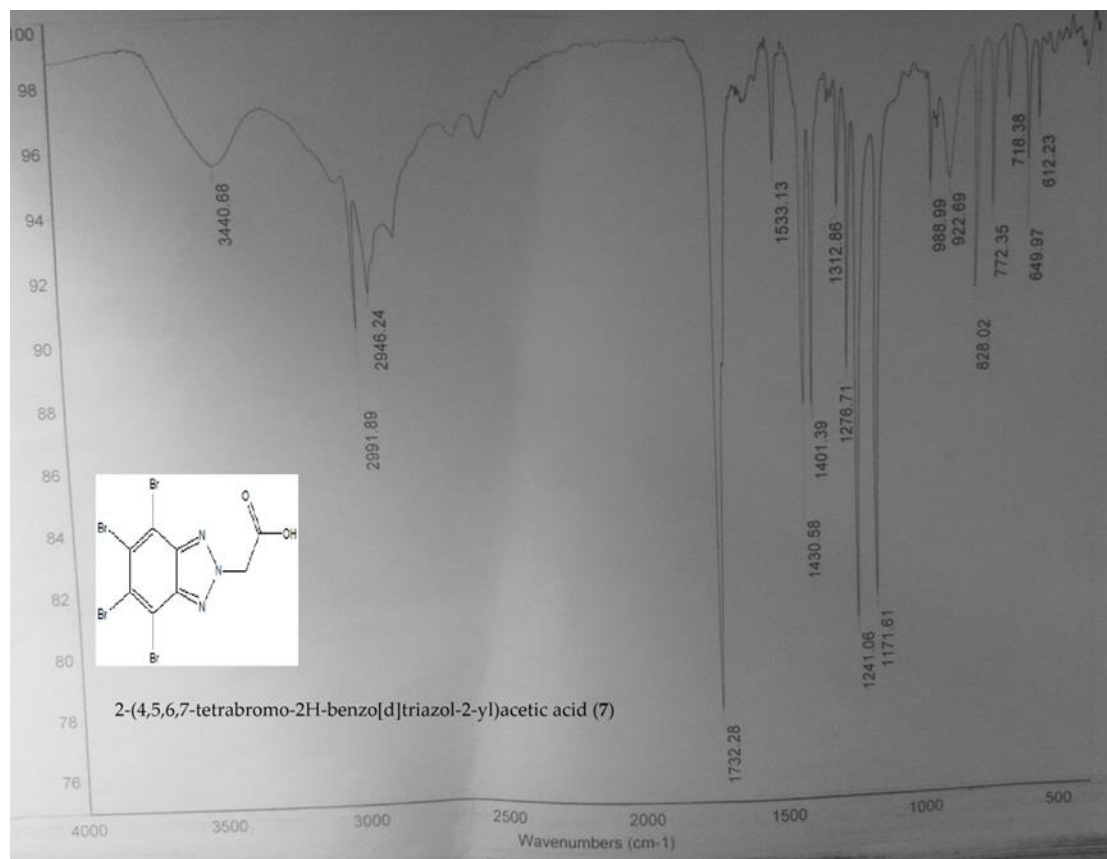

## References

1. Battistutta, R.; De Moliner, E.; Sarno, S.; Zanotti, G.; Pinna, L. A., Structural features underlying selective inhibition of protein kinase CK2 by ATP site-directed tetrabromo-2-benzotriazole. *Protein science : a publication of the Protein Society* **2001**, *10* (11), 2200-6.
2. Battistutta, R.; Cozza, G.; Pierre, F.; Papinutto, E.; Lolli, G.; Sarno, S.; O'Brien, S. E.; Siddiqui-Jain, A.; Haddach, M.; Anderes, K.; Ryckman, D. M.; Meggio, F.; Pinna, L. A., Unprecedented selectivity and structural determinants of a new class of protein kinase CK2 inhibitors in clinical trials for the treatment of cancer. *Biochemistry* **2011**, *50* (39), 8478-88.
